# Supplementary material for: Snapshots of Catalysis in the E1 Subunit of the Pyruvate Dehydrogenase Multienzyme Complex
Source: PubMed Central journal article supplement (PMC2663715; doi:10.1016/j.str.2008.10.009), 2008-12-12
Supplement: mmc1.pdf [file mmc1.pdf]

## Supplemental Data

### Snapshots of Catalysis in the E1 Subunit of the Pyruvate Dehydrogenase Multienzyme Complex

Xue Yuan Pei, Christopher M. Titman, René A.W. Frank, Finian J. Leeper, and Ben F. Luisi

#### SUPPLEMENTAL EXPERIMENTAL PROCEDURES

##### *Enzymatic analysis of Q81 $\alpha$*

Q81 $\alpha$  supports the diphosphate group of the ThDP and is not expected to play an important role in the catalytic process. Replacing Q81 $\alpha$  with glutamate, corresponding to the exchange of an amide for a carboxylate, was found to increase slightly DCPIP activity. The boost in activity in the DCPIP assay might be caused by the re-organization of solvent in the pocket to increase access for the substrates and DCPIP. The Q81E $\alpha$  mutant showed a similar level of activity to the wild type in activity of the full PDH complex (Table 3, main text).

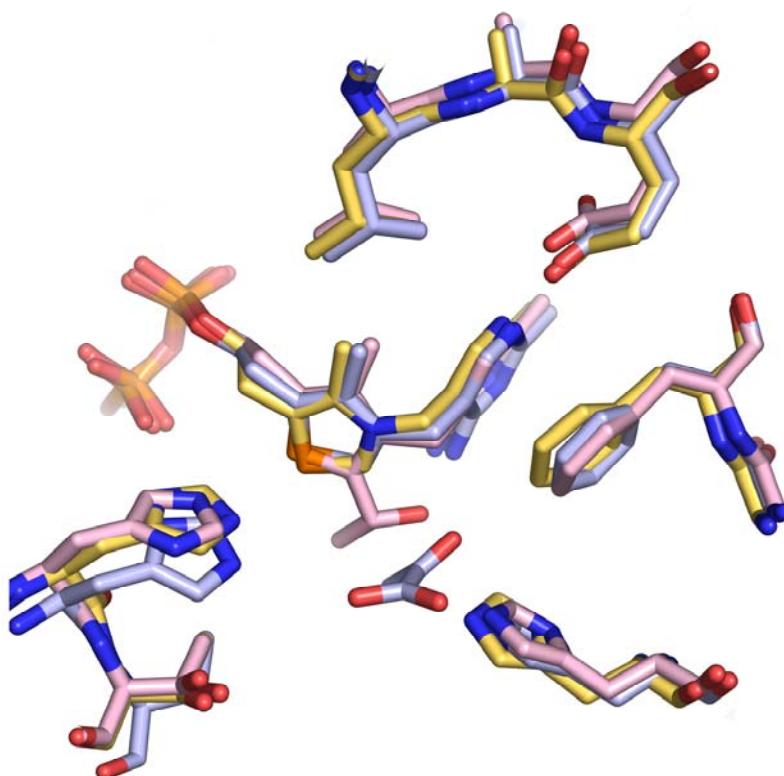

Fig S1

#### **Figure S1. View of the Active Site in the Common Reference Frame of the Cofactor**

Shown are the PDH structures with the natural ThDP (carbon atoms in yellow), the pyruvate complex (grey), and the mimic of enamine-ThDP (pink).

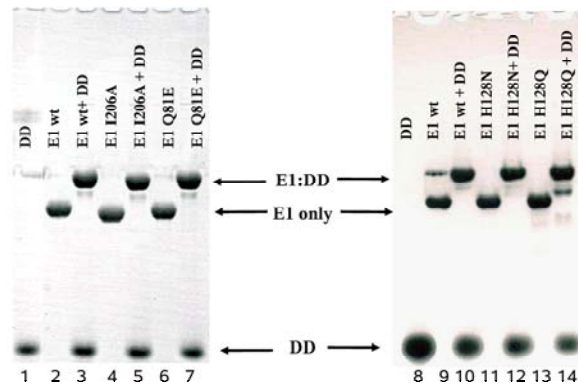

**Figure S2. Interactions of the Wild-Type and Mutant E1p Enzymes with the E2p Recognition Domain**

The E1p active-site mutants (H128N $\beta$ , H128Q $\beta$ , I206A $\alpha$ , and Q81E $\alpha$ ) were evaluated for their abilities to bind to E2p using electrophoretic mobilities in native gels in the presence and absence of the E2 lipoyl-PSBD di-domain. For all mutants, a band-shift was apparent, showing that the mutant E1p can bind the E2p di-domain, and implying that they are capable of assembling within the PDH multienzyme complex. These results are consistent with an earlier study that showed that active site mutations H128A $\beta$  and H271A $\alpha$  had no effect on binding of the E2p PSBD in *G. stercorothermophilus* E1p (Fries et al., 2003). Interactions were evaluated by mobility shifts using 8% polyacrylamide Tris-glycine buffered gels under native conditions. The di-domain of the PSBD and lipoyl domain was used for these experiments. Binding was observed for wild type and each of the mutants. Lane 1, E2p di-domain alone; lane 2, E1p wild type; lane 3, E1p wild type and E2p di-domain; lane 4, E1p I206A $\alpha$  mutant alone; lane 5, E1p I206A $\alpha$  and E2p di-domain; lane 6, E1p Q81E $\alpha$  mutant; lane 7, E1p Q81E $\alpha$  mutant and E2p di-domain; lane 8, E2 di-domain; lane 9, E1p wild type; lane 10, E1p wild type and E2p di-domain; lane 11, H128N $\beta$  mutant; lane 12, H128N $\beta$  mutant and E2p di-domain; lane 13, H128Q $\beta$  mutant; lane 14, H128Q $\beta$  mutant and E2 di-domain.

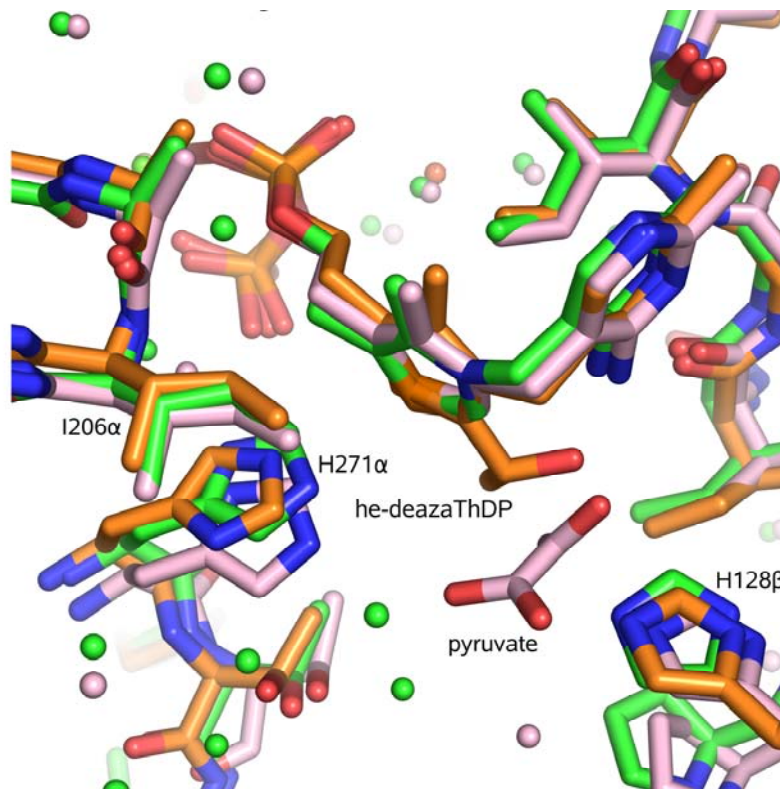

Fig S3

**Figure S3. Comparison of the Hydration Pattern at the Active Site**

Shown are the pyruvate-bound complex (pink) and the mimic of the enamine-ThDP intermediate (orange), and the wild type structure (green). The overlay shows that the hydration pattern has changed with the different co-factors and ligands (see also discussion in main text).

**SUPPLEMENTAL REFERENCE**

Fries, M., Jung, H.I., and Perham, R.N. (2003) Reaction mechanism of the heterotetrameric ( $\alpha 2\beta 2$ ) E1 component of 2-oxo acid dehydrogenase multienzyme complexes. *Biochemistry* 42, 6996-7002.
